# Supplementary material for: IAN Family Critically Regulates Survival and Development of T Lymphocytes
Source: PLOS journal article supplement (doi:10.1371/journal.pbio.0040103), 2006-03-01

# Figure S3

## A

|      | % identical / amino acids |             |             |             |             |             |             |             |  |
|------|---------------------------|-------------|-------------|-------------|-------------|-------------|-------------|-------------|--|
|      | IAN1                      | IAN2        | IAN3        | IAN4        | IAN5        | IAN6        | IAN7        | IAN9        |  |
| IAN1 | 100.0 / 328               |             |             |             |             |             |             |             |  |
| IAN2 | 37.9 / 235                | 100.0 / 300 |             |             |             |             |             |             |  |
| IAN3 | 37.2 / 288                | 39.2 / 240  | 100.0 / 293 |             |             |             |             |             |  |
| IAN4 | 36.5 / 233                | 40.1 / 287  | 41.4 / 220  | 100.0 / 301 |             |             |             |             |  |
| IAN5 | 38.3 / 240                | 47.1 / 210  | 42.9 / 217  | 83.8 / 291  | 100.0 / 308 |             |             |             |  |
| IAN6 | 38.8 / 206                | 43.7 / 197  | 39.5 / 195  | 50.3 / 183  | 50.6 / 180  | 100.0 / 305 |             |             |  |
| IAN7 | 39.3 / 270                | 38.4 / 203  | 53.1 / 290  | 37.6 / 229  | 37.6 / 229  | 41.4 / 203  | 100.0 / 291 |             |  |
| IAN9 | 32.7 / 223                | 41.1 / 192  | 42.3 / 189  | 39.9 / 203  | 39.9 / 203  | 41.1 / 180  | 39.8 / 186  | 100.0 / 688 |  |

## B

**G1 (P-loop)**  
 IAN4 1' METLQNVVTGGKGGCTSGSRPLR ILLVKGSGCGKSATGNSLLRRPAPESRLRGQS  
 \* \* \* \* \*  
 IAN5 1" MEHLQKSTYGTIVQGFPAHCVQESSCLR ILLVKGSGCGKSATGNSILRRPAPQRSRLRGQS

**G2** **G3**  
 IAN4 57' VTRTSQAETGTWEGRSILVVDTPPIFESKAQNQDMDKDIDGDCYLLCAPGPHVLLLVLTQLG  
 \* \* \* \* \*  
 IAN5 61" VTRTSQAETGTWEGRSILVVDTPPIFESKAQNQDMDKDIDGDCYLLCAPGPHVLLLVLTQLG

**G4**  
 IAN4 117' RFTAEDVMAVRMVKEVFGVGMHRMIVLTRKDLAEKSLEEFVTHTDNRSLSLVOECG  
 \* \* \* \* \*  
 IAN5 121" RFTAEDAMAVRMVKEVFGVGMHRMIVLTRKDLEEKSLLEEFVTHTDNRSLSLVOECG

**IAN motif** **Coiled coil**  
 IAN4 177' RRYCAFNNRASGEEQOQLAELMALVRRLEOECEGSFHSNDLFLHAETLLREQYSVHOEA  
 \* \* \* \* \*  
 IAN5 181" RRYCAFNNRASGEEQOQLAELMALVRRLEOECEGSFHSNDLFLHAEALLREQYSVHOEA

**Coiled coil** **Hydrophobic**  
 IAN4 237' YRCYLAKVROEVEKORWELEEOEGSWVLKVLPIGKKLEVLHSDFCWYLVLAAILIFFVFFF  
 \* \* \* \* \*  
 IAN5 241" YRCYLAKVROEVEKORWELEEOEGSWIAKMICTVKSCWSSHTAACLLIVLGLTLLTTFI

IAN4 297' LLFYV  
 \*  
 IAN5 301" NLCSRCK

## C

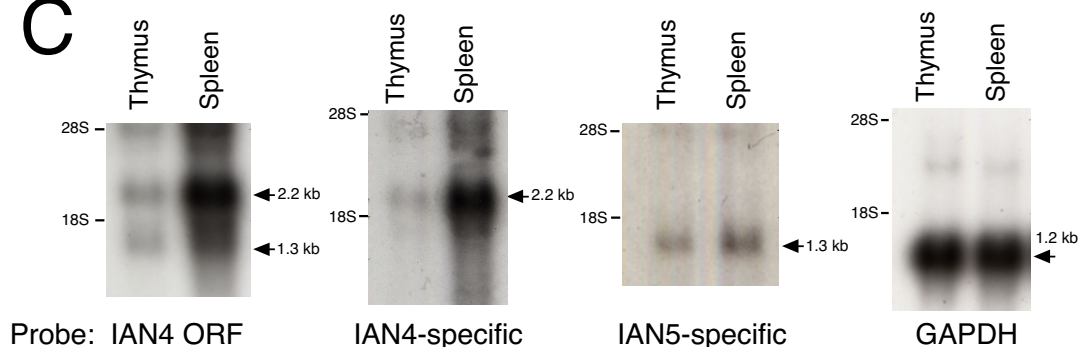

Supplement: S3 (10.1371/journal.pbio.0040103.s003) [file journal.pbio.0040103.s003]
