# Supplementary figures and images for: IAN Family Critically Regulates Survival and Development of T Lymphocytes
Source: PLOS journal article supplement (doi:10.1371/journal.pbio.0040103), 2006-03-01

# Figure S2

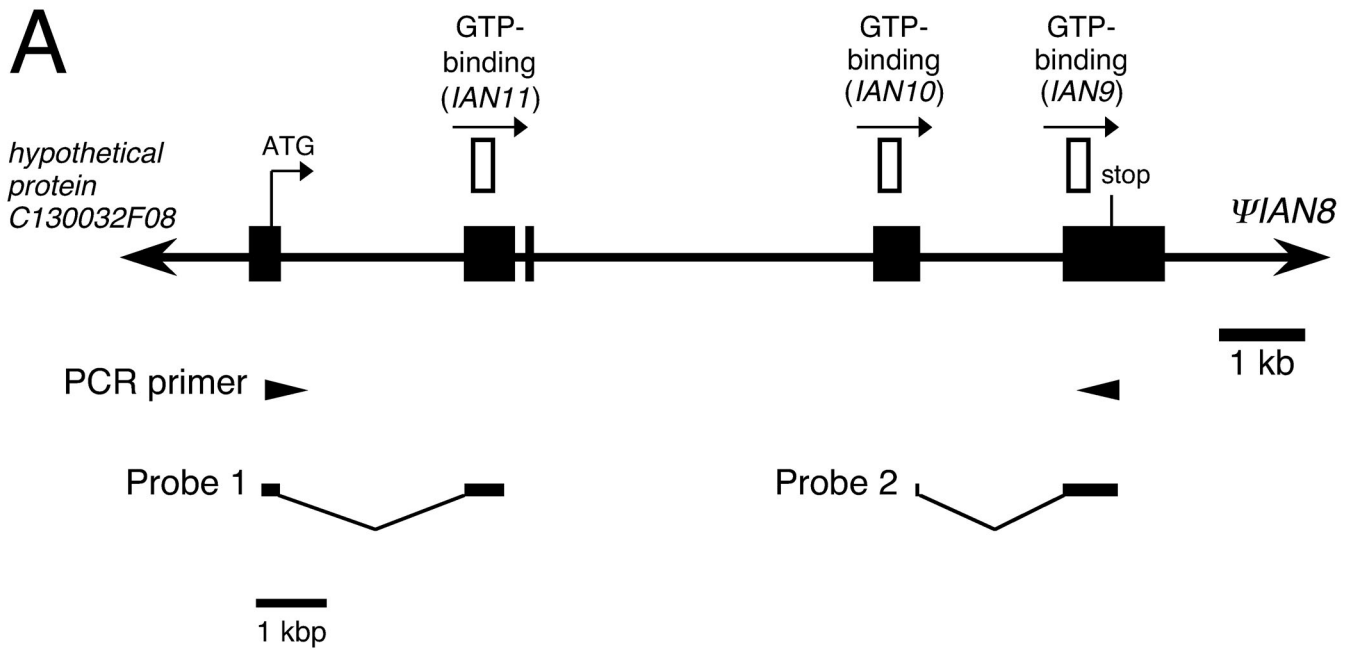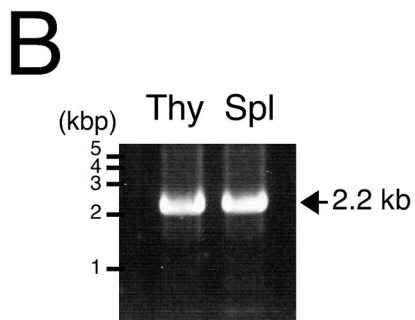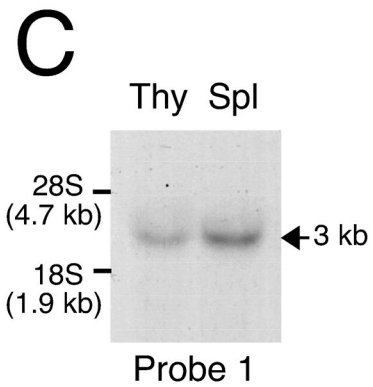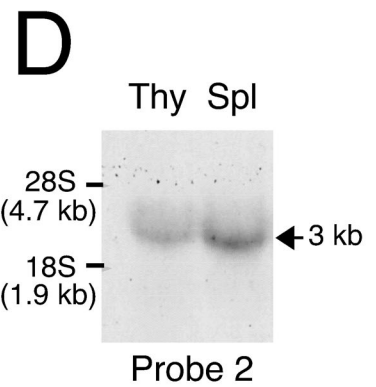

Supplement: S2 (10.1371/journal.pbio.0040103.s002) [file journal.pbio.0040103.s002]
